# Supplementary material
Source: PubMed Central journal article supplement (PMC5393965)

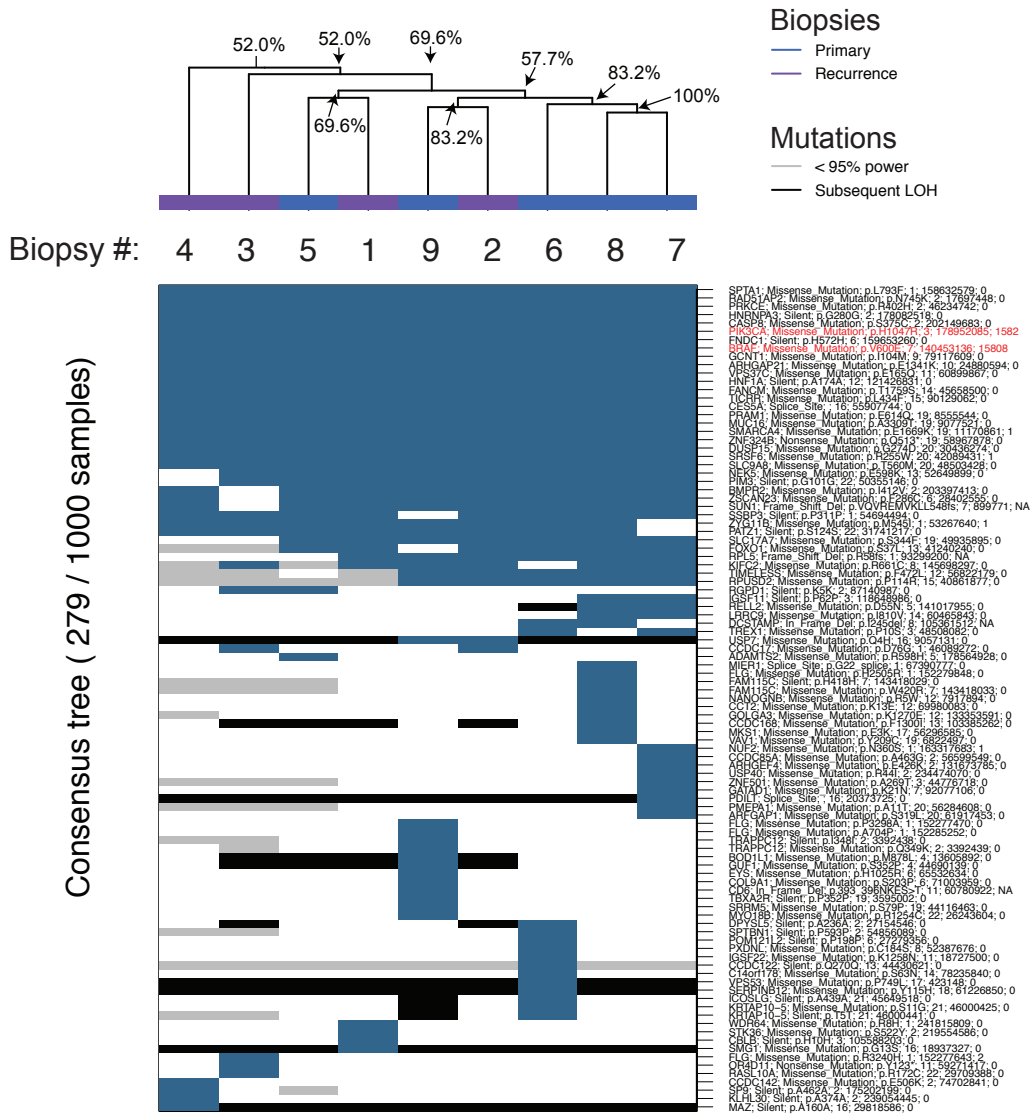

### Supplementary Figure 1

The most frequent phylogenetic tree based on sampling mutations according to their detection power (276/1000 samples). At top is a dendrogram where each split is labeled with the fraction of sampled trees containing an equivalent split. Filled blue squares indicate the presence of a mutation in a given biopsy. Mutations are labeled on the right hand column.



# Biopsy 2

purity( $\hat{\alpha}$ ) = 0.31, ploidy:  $\hat{\tau} = 1,84$ ,  $\hat{\tau}_g = 1,72$   
 $\sigma_H = 0.01$ ,  $\hat{\sigma}_A = 1$ ,  $\theta_Z = 0.13$ ,  $\theta_Q = 1.55$ ,  $\lambda = 100$   
SCNAs = -1334.05, Kar = -85.91, SSNVs = -569.96

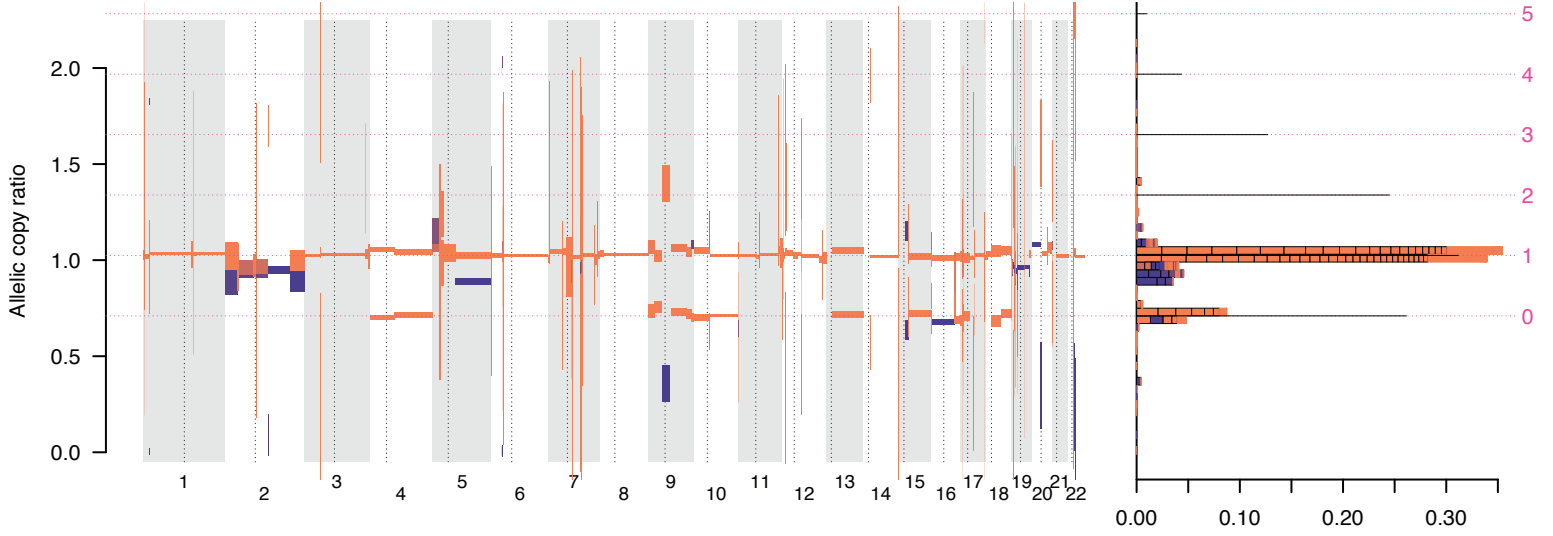

# Biopsy 3

purity( $\hat{\alpha}$ ) = 0.33, ploidy:  $\hat{\tau} = 1.8$ ,  $\hat{\tau}_g = 1.71$   
 $\sigma_H = 0.01$ ,  $\hat{\sigma}_A = 1$ ,  $\theta_Z = 0.13$ ,  $\theta_Q = 1.59$ ,  $\lambda = 100$   
SCNAs = -1341.9, Kar = -85.91, SSNVs = -528.28

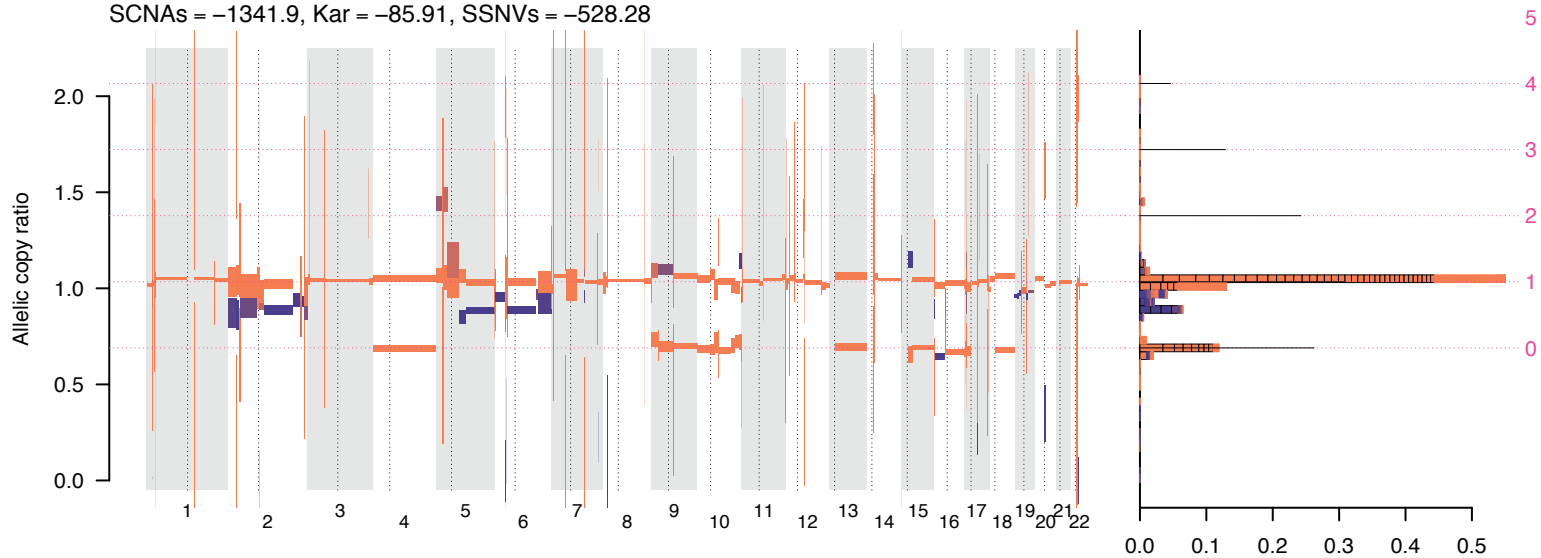

# Biopsy 4

purity( $\hat{\alpha}$ ) = 0.18, ploidy:  $\hat{\tau} = 1.96, \hat{\tau}_g = 1.74$   
 $\sigma_H = 0.01, \hat{\sigma}_A = 1, \hat{\theta}_Z = 0.1, \hat{\theta}_Q = 2.009, \lambda = 100$   
SCNAs = -1509.96, Kar = -85.91, SSNVs = -516.12

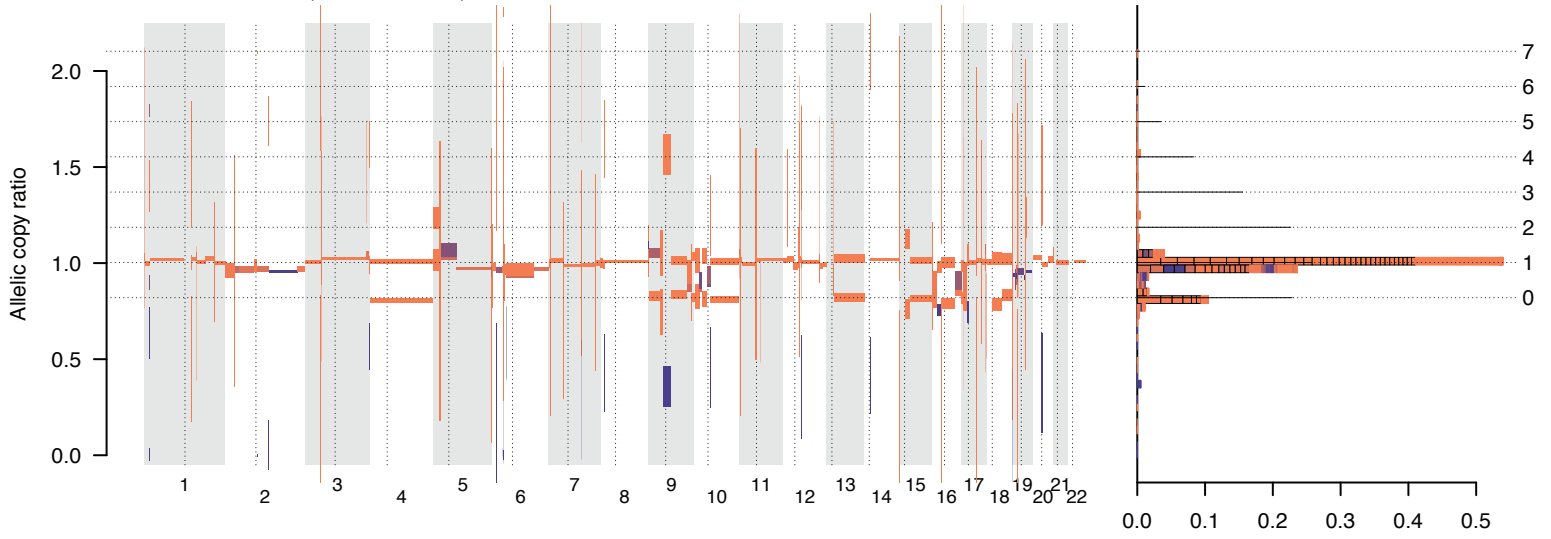

# Biopsy 5

purity( $\hat{\alpha}$ ) = 0.17, ploidy:  $\hat{t} = 1.85$ ,  $\hat{t}_g = 1.76$   
 $\sigma_H = 0.01$ ,  $\hat{\sigma}_A = 1$ ,  $\theta_Z = 0.05$ ,  $\theta_Q = 2.082$ ,  $\lambda = 100$   
SCNAs = -827.82, Kar = -85.91, SSNVs = -436.66

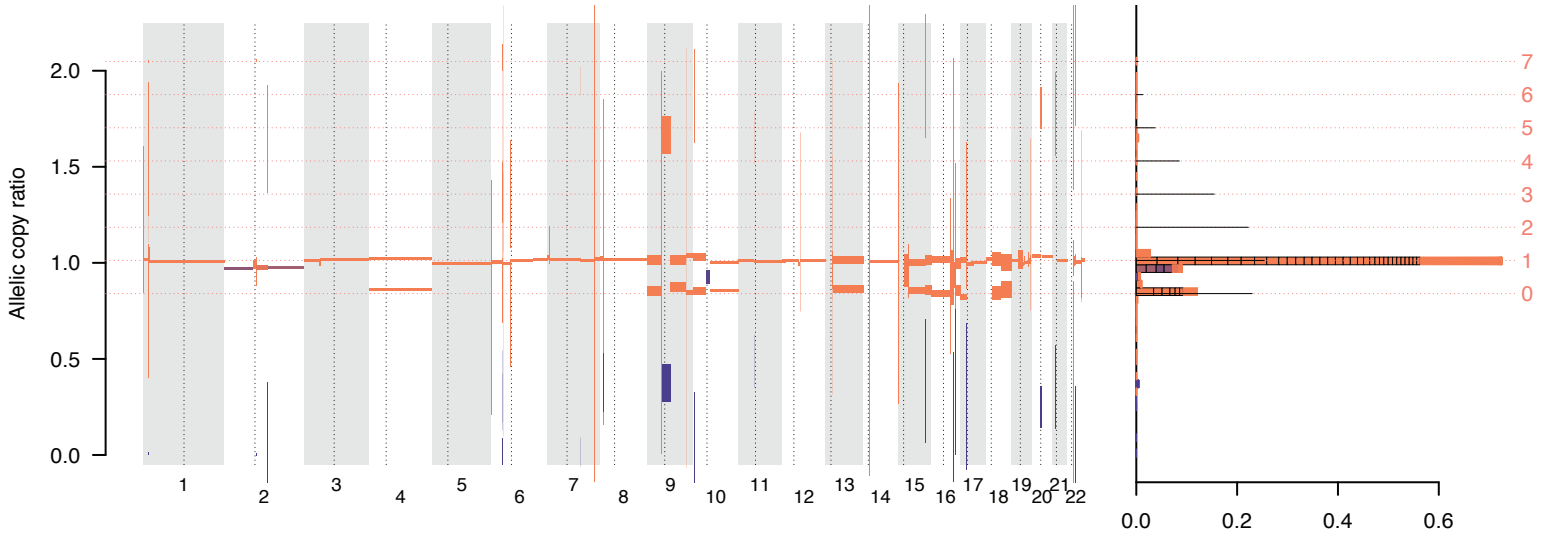

# Biopsy 6

purity( $\hat{\alpha}$ ) = 0.44, ploidy:  $\hat{t} = 1.86$ ,  $\hat{t}_g = 1.75$   
 $\sigma_H = 0.01$ ,  $\hat{\sigma}_A = 1$ ,  $\theta_Z = 0.02$ ,  $\theta_Q = 1.472$ ,  $\lambda = 100$   
SCNAs = -928.75, Kar = -81.76, SSNVs = -696.23

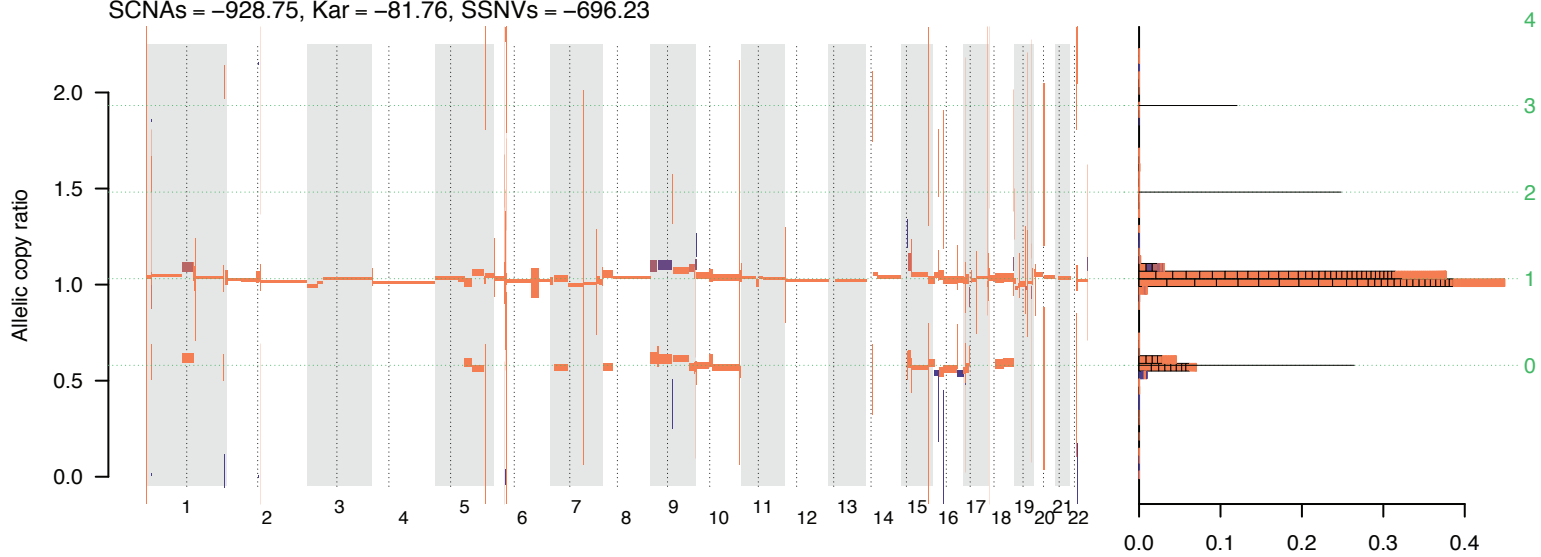

# Biopsy 7

purity( $\hat{\alpha}$ ) = 0.34, ploidy:  $\hat{t} = 1.9$ ,  $\hat{t}_g = 1.8$   
 $\sigma_H = 0.01$ ,  $\hat{\sigma}_A = 1$ ,  $\theta_Z = 0.01$ ,  $\theta_Q = 1.573$ ,  $\lambda = 100$   
SCNAs = -751.82, Kar = -73.44, SSNVs = -789.03

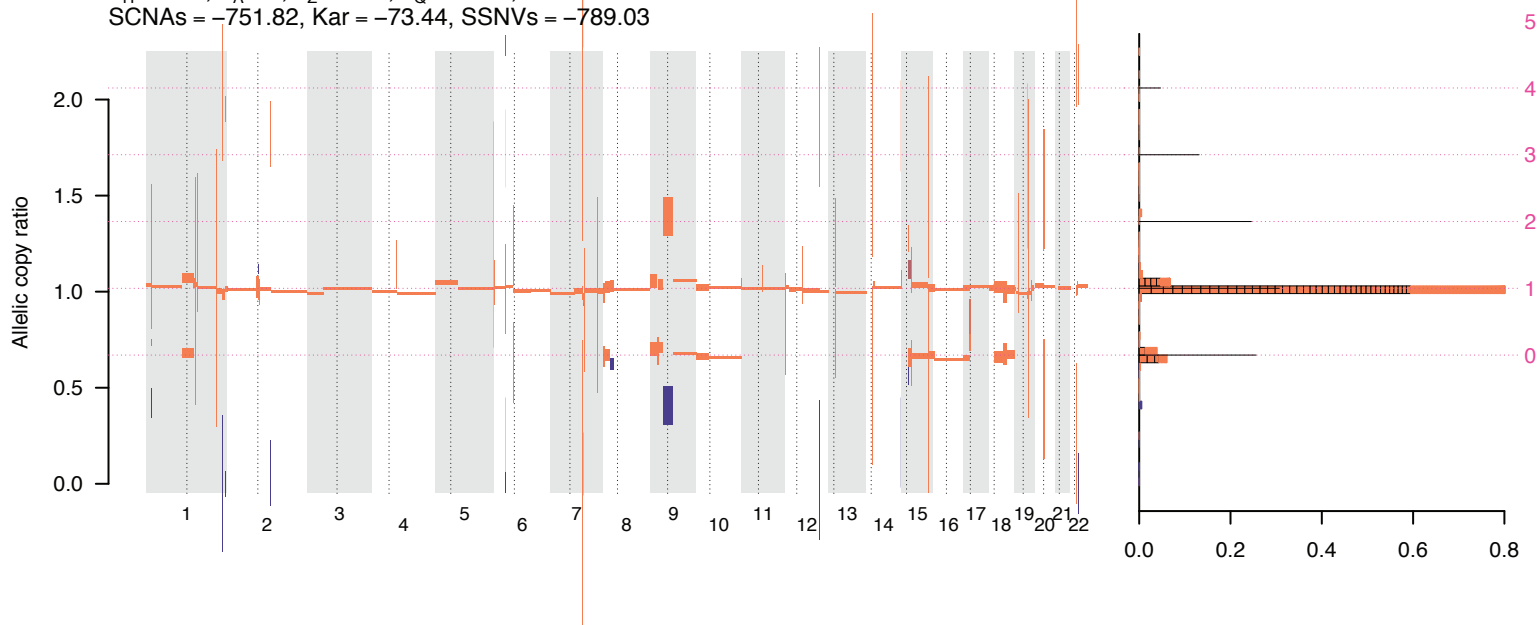



# Biopsy 8

purity( $\hat{\alpha}$ ) = 0.47, ploidy:  $\hat{t} = 1.88, \hat{t}_g = 1.81$   
 $\sigma_H = 0.01, \hat{\sigma}_A = 1, \theta_Z = 0.08, \theta_Q = 1.418, \lambda = 100$   
SCNAs = -710.41, Kar = -73.44, SSNVs = -693.85

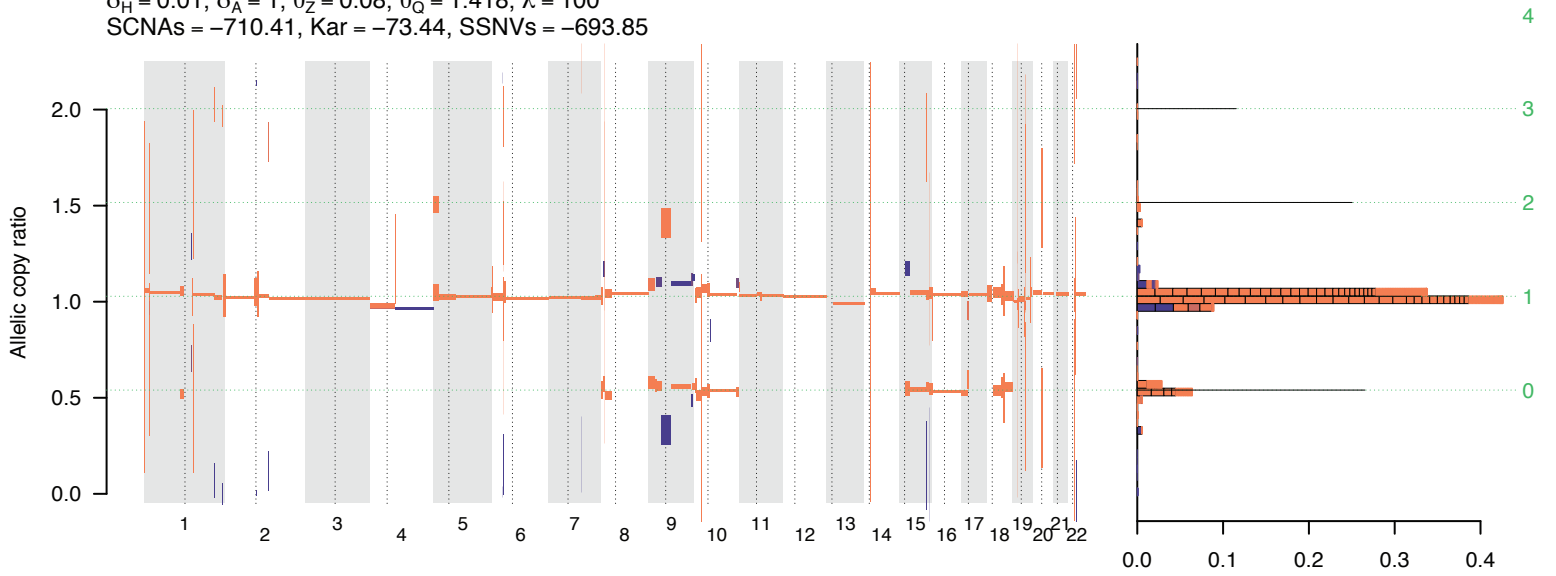

Biopsy 9

purity( $\hat{\alpha}$ ) = 0.42, ploidy:  $\hat{t} = 2, \hat{t}_g = 1.9$   
 $\sigma_H = 0.01, \hat{\alpha}_A = 1, \theta_Z = 0.01, \theta_Q = 1.507, \hat{\lambda} = 100$   
SCNAs = -1009.5, Kar = -56.63, SSNVs = -691.93

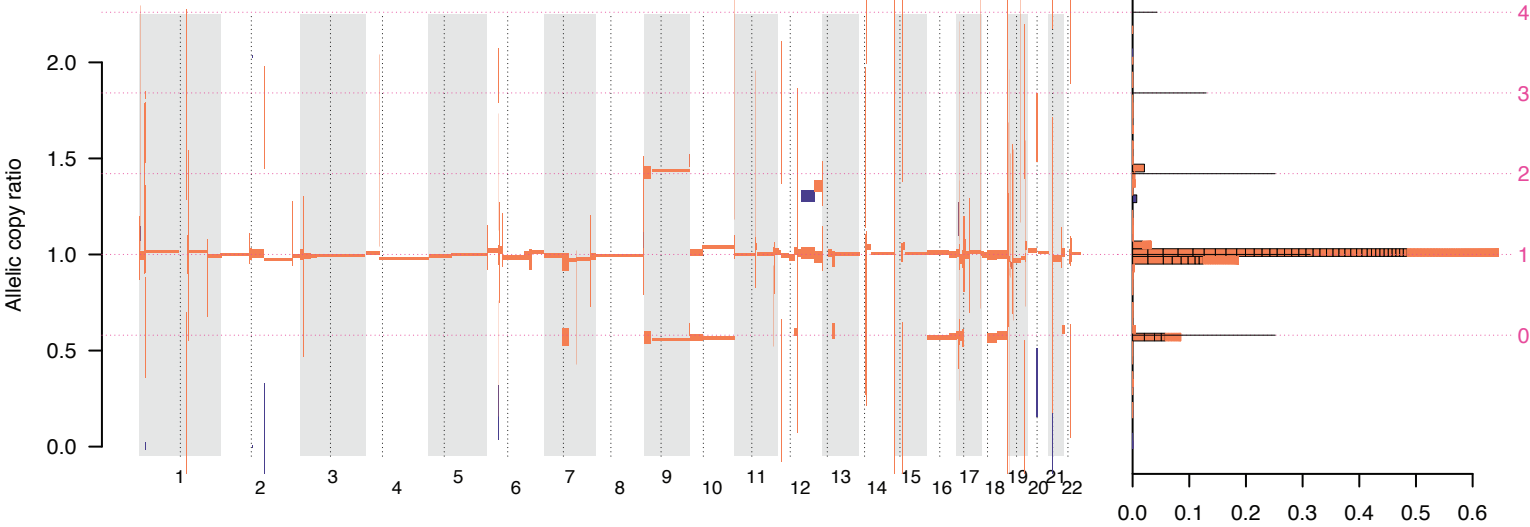

Supplement: NIHMS827097-supplement-1.pdf [file NIHMS827097-supplement-1.pdf]
